# Supplementary material
Source: ML conference proceedings conference paper supplement (https://openreview.net/forum?id=NcwyU596qZ)
Supplement: supplementary_material [file attachment]

# 4D-RGPT: Toward Region-level 4D Understanding via Perceptual Distillation

## Supplementary Material

511 **The appendix is organized as follows:**

- 512 • In Sec. A1, we provide implementation and training details for P4D and 4D-RGPT, including model architecture, training data, computational resources, and loss functions.
- 513
- 514
- 515 • In Sec. A2, we provide the detailed design of R4D-Bench, including the nine question categories and dataset curation process.
- 516
- 517
- 518 • In Sec. A3, we provide additional experimental results, including results with other NVILA variants, analysis of temporal perception capabilities, training data mixture, more qualitative results, and visualizations.
- 519
- 520
- 521

## 522 A1. Additional Details

### 523 A1.1. Model Architecture

524 **MLLM.** As mentioned in Sec. 6.1, we use NVILA-Lite-8B [37] as our base MLLM in the main experiments. NVILA is a unified open-sourced MLLM family that tackles both image and video understanding.

525  
526  
527  
528 Considering the tradeoff between performance and inference efficiency, there are two groups of NVILA variants, e.g., NVILA (Base) and NVILA-Lite, where the latter is more efficient. For example, NVILA-Lite uses a  $3 \times 3$  down-sampling kernel in  $\mathbf{E}_p$  while NVILA (Base) uses  $2 \times 2$ . We select NVILA-Lite as our base MLLM due to its competitive performance and higher efficiency.

529  
530  
531  
532 For all NVILA variants, we use their open-sourced weights from HuggingFace [68]. Specifically, we use the following checkpoints:

- 533 • `Efficient-Large-Model/NVILA-Lite-8B` ;
- 534
- 535 • `Efficient-Large-Model/NVILA-Lite-15B` ;

536  
537  
538 For the vision encoder (tower)  $\mathbf{E}_v$ , they use SigLIP [79], specifically `siglip-so400m-patch14-384`. For the multi-modal projector  $\mathbf{E}_p$ , they use a 2-layer MLP with a hidden dimension of 4,608.

539  
540  
541  
542  
543  
544 **4D Perception Model.** As mentioned in Sec. 6.1, we use L4P [37] as our 4D perception model. A 40-layer ViT-based video encoder from VideoMAEv2 [65] is adopted for  $\mathbf{E}_{4D}$ , and DPT [52] is adopted for each  $\mathbf{D}_m$  where  $m \in \mathcal{M}$ . Each  $\mathbf{D}_m$  has the same architecture but different output channels depending on the target modality. As mentioned in Sec. 3, the output channels are 1, 2, 1, 6 for the depth, flow, motion, camray, respectively.

545  
546  
547  
548  
549  
550  
551  
552 **4D-RGPT.** In 4D-RGPT, we design a lightweight 4D perception decoder  $\mathbf{D}_{4DP}$  to efficiently extract 4D perceptual latent from LLM’s hidden states. It is a 3-layer MLP with a hidden dimension of 2,560. We use GELU [17] as the activation function between each layer. For initialization, we use

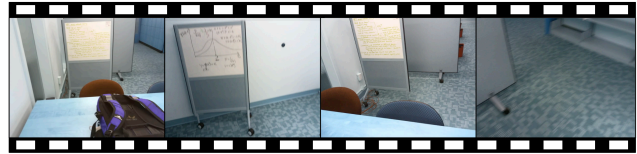

Figure A1. An example from VSTI-Bench [15] training data. The corresponding conversation is as follows: (1) *User*: “These are frames of a video. Approximately how far (in meters) did the camera move between frame 14 and frame 20 of 32? Please answer the question using a single word or phrase.”; (2) *GPT*: “1.6”.

Xavier initialization [16] for all weights and zeros for all biases. Additionally, 4D-RGPT employs Temporal Positional Encoding (TPE) to enhance the temporal understanding of the model. For TPE (Eq. (5)), we use  $T = 10,000$ .

### 561 A1.2. Data Mixture

562 We provide more details about the training data mixture used in our training.

563  
564 **VSTI-Bench [15]** is a new dataset built upon VSI-Bench [75]. While VSI-Bench focuses on the spatial understanding of static 3D scenes, VSTI-Bench further investigates the spatial-temporal understanding of how spatial relations evolve over time. We use only the training set of VSTI-Bench and do not use the VSI-Bench. The videos are sourced from ScanNet [13] and ScanNet++ [77]. The training set contains roughly 1.2k unique videos and 130k QA pairs. A training sample is shown in Fig. A1.

565  
566  
567  
568  
569  
570  
571  
572 **Wolf [26]** is a large-scale video captioning dataset with high-quality captions generated by VLMs. Wolf provides detailed captions across three domains: autonomous driving, general scenes, and robotics. We use the NuScenes [4] portion of Wolf, i.e., the autonomous driving domain. We use Llama-3.1-70B-Instruct [14] with the template-based text prompts to generate question-answer pairs based on these captions, creating conversational data suitable for 4D VQA training. The training set contains roughly 5k unique videos and 15k QA pairs. A training sample is shown in Fig. A2.

573  
574  
575  
576  
577  
578  
579  
580  
581  
582 **RoboFAC [39]** is a large-scale dataset for semantic understanding of robotic arm videos, including a training split with simulated robotic arm videos involving various actions. We adopt it into our training data mixture due to its stable camera views with limited background variations but rich robotic arm movements. It contains roughly 10k unique videos and 65k conversations. A training sample is shown in Fig. A3.

583  
584  
585  
586  
587  
588  
589  
590  
591  
592 **SAT [54]** is an image-based VQA dataset. Though it is image-based, we consider it helpful for 4D VQA training

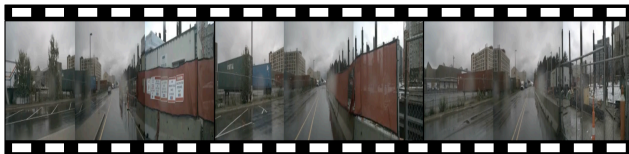

Figure A2. **An example from Wolf [26] training data.** The corresponding conversation is as follows: (1) *User*: “What traffic participants are around the ego-centric vehicle in the video? Please count and list all of them.”; (2) *GPT*: “1 car is near the ego vehicle’s expected path. 1 traffic cone is in the ego vehicle’s lane and potentially blocking the ego vehicle. 4 barriers are in the ego vehicle’s lane and potentially blocking the ego vehicle.”.

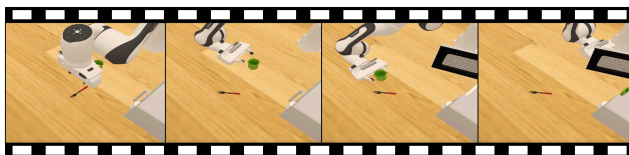

Figure A3. **An example from RoboFAC [39] training data.** The corresponding conversation is as follows: (1) *User*: “From the video, what task is the robot engaged in?”; (2) *GPT*: “Put the fork in the cup and put them in the microwave.”.

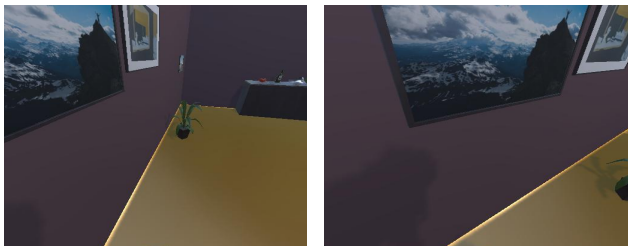

(a) First frame.

(b) Second frame.

Figure A4. **An example from SAT [54] training data.** The corresponding conversation is as follows: (1) *User*: “Were any of the objects in the initial frame that you can still see in the second frame moved from their original positions? Options: [‘green tapered square potted houseplant was moved right and towards the camera in the first frame’, ‘green tapered square potted houseplant was moved left and away from the camera in the first frame’]”; (2) *GPT*: “green tapered square potted houseplant was moved right and towards the camera in the first frame.”.

593 due to its relevance on dynamic scene understanding across  
594 images. The training set contains roughly 190k unique simu-  
595 lated images and 170k QA pairs. A training sample is shown  
596 in Fig. A4.

### 597 A1.3. Training Details

598 Our training starts from the pre-trained NVILA weights with  
599 an initial learning rate of  $1e-5$ . We use a cosine learning  
600 rate scheduler with a warmup ratio of 0.03. We train on  
601 a multi-node cluster comprising 8 nodes. Each node has  
602 NVIDIA A100-SXM4-80GB GPUs and an AMD EPYC  
603 7J13 64-Core Processor CPU. The total batch size is 1,024.

We train for 5 epochs over approximately 12 hours. 604

**Losses.** As mentioned in Sec. 4.2, we train our model with 605  
both SFT loss  $\mathcal{L}_{\text{SFT}}$  and P4D loss, *i.e.*, latent distillation loss 606  
 $\mathcal{L}_{\text{LD}}$  and explicit distillation loss  $\mathcal{L}_{\text{ED}}$ . Specifically, our total 607  
loss is 608

$$\mathcal{L} = \mathcal{L}_{\text{SFT}} + \alpha \mathcal{L}_{\text{LD}} + \beta \mathcal{L}_{\text{ED}}, \quad (\text{A8}) \quad 609$$

where  $\alpha$  and  $\beta$  are hyperparameters to balance the three loss 610  
terms. We set  $\alpha = 0.5$  and  $\beta = 0.1$ . 611

In Eq. 6, we set  $\Delta_{\text{LD}}$  to be the Smooth-L1 distance 612  
function. In Eq. 7, we set each  $\Delta_m$  to be the Smooth- 613  
L1 distance function and  $\lambda_m$  to be 1.0, 0.1, 0.05, 0.05 for 614  
 $m \in \{\text{depth, flow, motion, camray}\}$ , respectively. 615

## A2. R4D-Bench 616

We provide more details about R4D-Bench, including the 9 617  
question categories (Sec. A2.2) and dataset curation process 618  
(Sec. A2.1). 619

### A2.1. Dataset Curation 620

To construct R4D-Bench, we develop a hybrid automated 621  
and human-in-the-loop process that converts existing non- 622  
region-based 4D VQA benchmarks into region-based format. 623  
Recall Sec. 5 and Fig. 3, our curation process consists of 624  
the following stages. 625

(a) **Keyword Extraction.** Given a question  $Q$  and the first 626  
frame  $I^{(1)}$  of a video, we first identify the objects mentioned 627  
in  $Q$ . We employ Qwen2.5-VL-32B-Instruct [51] to parse 628  
the question and extract object references. The model is 629  
given the following system prompt. 630

**Task:** You will receive (1) an RGB image (the first frame of  
a video) and (2) a natural-language question about objects  
in the image.

**Instructions:** Identify the object(s) mentioned in the ques-  
tion and wrap them with angle brackets  $\langle \rangle$ . Do not change  
any other part of the text. If no object matches, return the  
original question.

**Example:**

*Input:* “What is the teacher right hand holding?”

*Output:* “What is the  $\langle \text{teacher} \rangle$  right hand holding?”

(b) **Detect & Segment.** If the segmentation masks of the 632  
identified objects are annotated in the original source, *e.g.*, 633  
DAVIS [48, 49], we skip this stage. Otherwise, we extract the 634  
2D bounding boxes and segmentation masks for each identi- 635  
fied object using a combination of GroundingDINO [35] 636  
and SAM2 [53]. Specifically, we use GroundingDINO 637  
([IDEA-Research/grounding-dino-base](https://github.com/IDEA-Research/grounding-dino-base) 638  
from HuggingFace) to detect objects based on the extracted 639  
object classes from (a). We set both detection and text 640  
thresholds to 0.25. The detected bounding boxes are 641

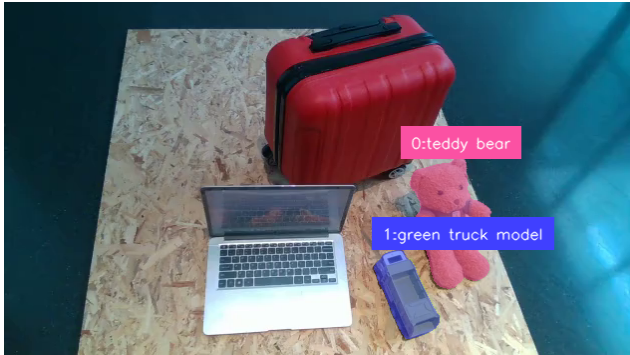

Figure A5. An example of SoM visual input in R4D-Bench. We apply SoM [74] on  $I^{(1)}$  to generate intermediate region-based visual inputs. The corresponding input  $Q$  is “At 9.00 sec, what is the positional relationship of the *green truck model* relative to the *teddy bear*?”

642 then refined using SAM2 ( `sam2.1_hiera_large` ) to  
643 obtain refined segmentation masks.

644 (c) **Set of Marks.** We leverage Set-of-Mark (SoM) [74]  
645 to generate an intermediate region-based visual, serving as  
646 a bridge to convert non-region-based inputs into our final  
647 region-based format. We overlay numbered markers on the  
648 detected objects in  $I^{(1)}$ , creating an annotated image  
649 where each object is labeled with a unique ID and its class  
650 name, e.g., “0:cat”, “1:table”. An example image is shown  
651 in Fig. A5.

652 (d) **Matching.** We feed the annotated image from (c) and  $Q$   
653 into Qwen2.5-VL-32B-Instruct with the following prompt  
654 to match the objects in  $Q$  to the marked regions.

**Task:** You will receive (1) an RGB image with labeled objects (a frame from a video) and (2) a natural-language question.

**Instructions:**

- Identify which labeled objects the question refers to
- Replace object mentions with tokens: `<obj_1>`, `<obj_2>`, etc.
- If no objects match, return the original question with empty `obj_classes`

**Output Format:** End your answer with “### Final Answer:” followed by JSON:

```
{
  "question": "...",
  "obj_classes": ["id:class_name", ...]
}
```

**Examples:**

$Q$ : “What is the color of the car?”

(car labeled as 1:car)

$A$ :

```
{
  "question": "What is the color of
```

```
        <obj_1>?",
  "obj_classes": ["1:car"]
}

 $Q$ : “What is the color of the cars?”
(two cars: 1:car, 2:car)
 $A$ :

{
  "question": "What is the color of
              <obj_1> and <obj_2>?",
  "obj_classes": ["1:car", "2:car"]
}

 $Q$ : “What is the color of the car?”
(no car labeled)
 $A$ :

{
  "question": "What is the color of
              the car?",
  "obj_classes": []
}
```

(e) **Verification.** We manually verify all converted questions to ensure quality. We use Label Studio [62] to build a simple interface where human annotators can review each QA pair along with the video and the detected regions. Questions where the grounding fails, i.e., no objects detected or object misalignment, are fixed by annotators. If a question cannot be fixed, it is filtered out. We trim down the input video if the object appears later in the video instead of the first frame. We exclude VQA sample where the object of interest in  $Q$  is too ambiguous to ground clearly for our human annotators. The final R4D-Bench contains 1,517 region-based QA pairs.

## A2.2. Question Categories

R4D-Bench contains 9 question categories covering both `static` and `dynamic` aspects of 4D understanding. Of the 9 categories, 4 of them are sourced from VLM4D [88] and the other 5 are sourced from STI-Bench [29]. For each category, we provide its definition below. We also attach several video examples in the supplementary folder under `r4d_examples/`.

For the **Translational (T)**, **Rotational (R)**, **Counting (C)**, and **False Positive (FP)** questions, we follow the definitions in VLM4D [88]. We downloaded the dataset from their official source on HuggingFace, i.e., `shijiezhou/VLM4D`. However, as of the time of writing, they do not provide the list of QA pairs for each category. Therefore, we leverage Qwen2.5-VL-32B-Instruct [51] and human annotators to classify each QA pair into the 4 categories. Of the region-based QA pairs in R4D-Bench obtained from VLM4D, the distribution across different categories is as follows:

- Translational: 61.3%
- Rotational: 10.2%

655

- 688 • Counting: 15.4%
- 689 • False Positive: 13.1%

690 In comparison, the official VLM4D benchmark has the fol-  
691 lowing distribution:

- 692 • Translational: 55%
- 693 • Rotational: 19%
- 694 • Counting: 17%
- 695 • False Positive: 9%

696 Our categorization results are largely consistent with the  
697 official distribution with slight difference.

698 For the 3D Video Grounding (VG), Spatial Relationship  
699 (SR), Dimension Measurement (DM), Displacement &  
700 Path Length (DP), and Speed & Acceleration (SA)  
701 questions, we follow the definition of STI-Bench [29]. We down-  
702 loaded the dataset from their official source on Hugging-  
703 Face, *i.e.*, [MINT-SJTU/STI-Bench](#). We note that the  
704 original STI-Bench contains two additional categories, *i.e.*,  
705 *Ego-centric Orientation* and *Trajectory Description*, where  
706 these questions focuses on the ego-centric 4D understand-  
707 ing from the viewpoint itself. Since R4D-Bench focuses  
708 on region-based 4D VQA, where another region of interest  
709 needs to be provided, these questions are not applicable and  
710 removed from R4D-Bench.

711 The followings are the detailed explanations for each  
712 category:

713 **Translational (T)** questions target the MLLM’s capabilities  
714 to understand the linear movement of objects. They usually  
715 involve the following movement-related direction, such as left,  
716 right, north, south, away, towards, etc. We provide several  
717 examples of R4D-Bench translational questions in Fig. A6.

718 **Rotational (R)** questions, on the other hand, care about the  
719 rotational movement of objects. They usually involve the fol-  
720 lowing movement-related words, such as rotate, spin, twist,  
721 turn, etc. We provide several examples of R4D-Bench rota-  
722 tional questions in Fig. A7.

723 **Counting (C)** questions focusing on the MLLM’s ability to  
724 accurately count the number of objects or occurrences of ac-  
725 tions. We provide several examples of R4D-Bench counting  
726 questions in Fig. A8.

727 **False Positive (FP)** questions are designed to trick the  
728 MLLM. The questions will intentionally describe events  
729 that do not actually occur within the video, *e.g.*, asking about  
730 movements when no object is moving. We note that the origi-  
731 nal VLM4D false positive questions also ask about objects  
732 that do not exist in the video. Due to the nature of region-  
733 based 4D VQA in R4D-Bench, we do not include these types  
734 of questions since the regions cannot refer to non-existent  
735 objects. We provide several examples of R4D-Bench false  
736 positive questions in Fig. A9.

737 **3D Video Grounding (VG)** questions ask MLLMs to retrieve  
738 the 3D bounding box of objects. The options are formatted  
739 as JSON with “dimension (size)”  $\in \mathbb{R}^3$ , “central point (co-

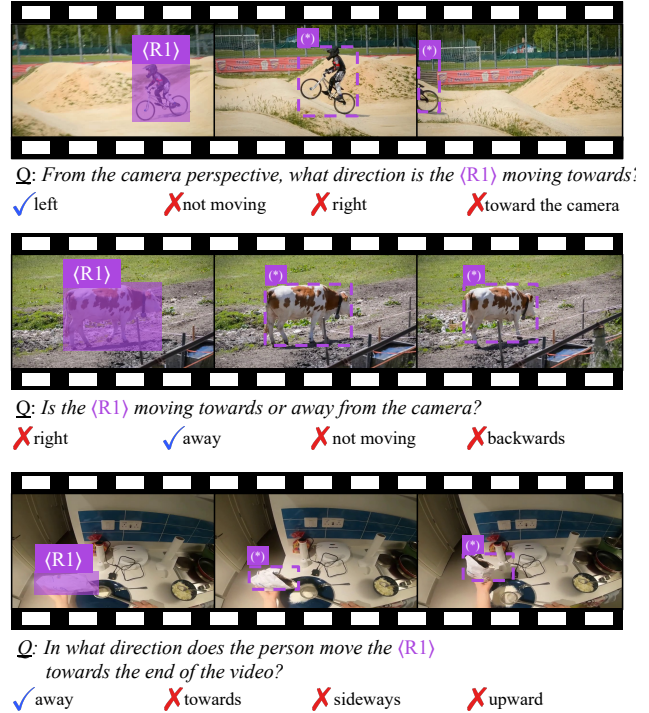

Figure A6. **Translational questions in R4D-Bench.** We note that the regions labeled with (\*) are not provided in R4D-Bench; they are visualized for readability.

ordinate”  $\in \mathbb{R}^3$  and “orientation”  $\in \mathbb{R}^3$ , (*i.e.*, yaw, pitch, 740  
and roll) or “camera heading”  $\in \mathbb{R}^1$ . We provide an example 741  
in Fig. A10. As shown in the example, the MLLM needs to 742  
be fairly precise to answer these questions correctly, as the 743  
differences between options can be quite small. 744

**Spatial Relationship (SR)** questions assess the 3D spatial 745  
relationship between selected objects or the camera. The 746  
options usually involve relative positioning terms, such as 747  
left, right, front, back, up, down, etc. We provide an example 748  
of R4D-Bench spatial relation questions in Fig. A11. 749

**Dimension Measurement (DM)** questions care about the 750  
physical measurements of objects, such as size and distance. 751  
They usually require MLLMs to understand and perceive 752  
depth information in order to predict the numerical values. 753  
We provide an example of R4D-Bench dimension measure- 754  
ment questions in Fig. A12. 755

**Displacement & Path Length (DP)** questions measures 756  
the travel distance of objects. They often involve MLLMs to 757  
track motion across selected frames. We provide an example 758  
of R4D-Bench displacement and path length questions in 759  
Fig. A13. 760

**Speed & Acceleration (SA)** questions estimate the motion 761  
dynamics of objects. The MLLM needs to consider both the 762  
displacement and time intervals to answer them correctly. 763

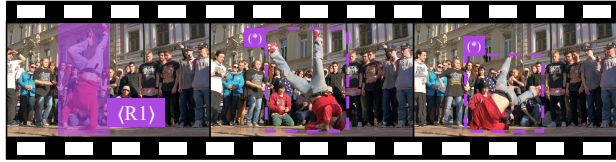

Q: Is (R1) spinning clockwise or counter-clockwise?  
 X no dancers    X counter-clockwise    ✓ clockwise    X no spinning

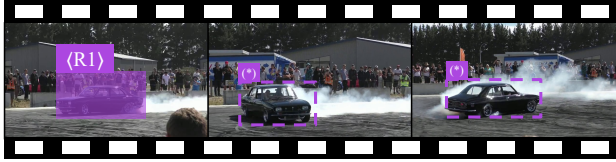

Q: Is the (R1) spinning clockwise or counter-clockwise?  
 X clockwise    X no cars    X not moving    ✓ counter-clockwise

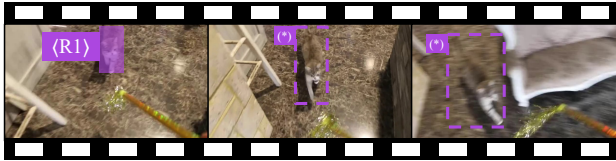

Q: Is (R1) turning to the left or right from its own perspective?  
 ✓ left    X right    X not moving    X not sure

Figure A7. **Rotational questions in R4D-Bench.** We note that the regions labeled with (\*) are not provided in R4D-Bench; they are visualized for readability.

764 We provide an example of R4D-Bench speed and acceleration questions in Fig. A14.  
 765

### 766 A3. Additional Results

767 **More NVILA variants.** In Tab. A1 and Tab. A2, we provide  
 768 additional results using NVILA-Lite-15B as the base MLLM  
 769 on non-region-based 4D VQA and R4D-Bench, respectively.  
 770 We observe consistent performance improvements across  
 771 various benchmarks.

Table A1. **Evaluation on non-region-level 3D / 4D benchmarks.** We report the average multiple-choice accuracy ( $\uparrow$ ) on each benchmark. For simplicity, we use the following abbreviations: STI (STI-Bench [29]), V4D (VLM4D-real [88]), MMSI (MMSI-Bench [76]), OS (OmniSpatial [21]), and VSTI (VSTI-Bench [15]).

| Methods            | STI  | V4D  | MMSI | OS   | SAT  | VSTI  |
|--------------------|------|------|------|------|------|-------|
| NVILA-Lite-8B      | 33.8 | 46.5 | 31.3 | 37.2 | 62.0 | 45.2  |
| 4D-RGPT-8B (Ours)  | 37.6 | 52.7 | 33.3 | 40.4 | 64.7 | 59.1  |
|                    | +3.8 | +6.2 | +2.0 | +3.2 | +2.7 | +13.9 |
| NVILA-Lite-15B     | 34.2 | 45.1 | 29.5 | 41.0 | 62.7 | 42.4  |
| 4D-RGPT-15B (Ours) | 38.1 | 53.7 | 31.7 | 42.7 | 65.3 | 58.6  |
|                    | +3.9 | +8.6 | +2.2 | +1.7 | +2.6 | +16.2 |

772 **Temporal Perception.** As discussed in Sec. 4.1 and Sec. 6.3,

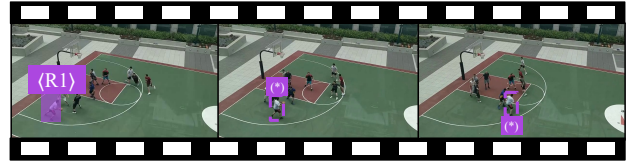

Q: How many times did (R1) dribble the ball with his left hand?  
 X4    X8    X1    ✓0

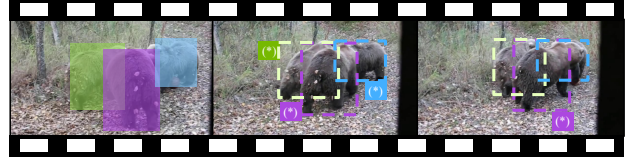

Q: How many times did (R1), (R2), (R3) are facing away from the camera?  
 X1    X0    X3    ✓2

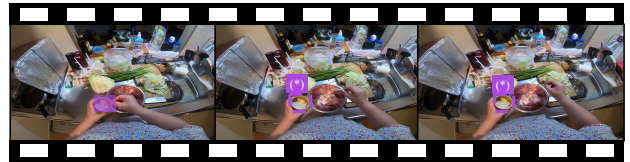

Q: How many spoonfuls of (R1) did the person pour to the right?  
 X3    ✓2    X4    X1

Figure A8. **Counting questions in R4D-Bench.** We note that the regions labeled with (\*), (\*), or (\*) are not provided in R4D-Bench; they are visualized for readability.

Table A2. **Evaluation on R4D-Bench.** We report performance on the static split (**Sta**), the dynamic split (**Dyn**), and all 9 tasks of R4D-Bench. For simplicity, we abbreviate them as follows: 3D Video Grounding (**VG**); Dimension Measurement (**DM**); Spatial Relationship (**SR**); Rotational (**R**); Counting (**C**); Translational (**T**); False Positive (**FP**); Speed & Acceleration (**SA**); and Displacement & Path Length (**DP**).

| Methods            | Avg  | Sta  | Dyn  | VG   | DM   | SR   | R    | C    | T    | FP   | SA   | DP   |
|--------------------|------|------|------|------|------|------|------|------|------|------|------|------|
| NVILA-Lite-8B      | 37.9 | 29.1 | 41.3 | 33.9 | 20.2 | 46.3 | 41.5 | 39.6 | 41.9 | 40.7 | 45.9 | 32.1 |
| 4D-RGPT-8B (Ours)  | 42.2 | 32.9 | 45.7 | 35.1 | 26.3 | 52.2 | 43.1 | 40.1 | 48.7 | 40.2 | 50.9 | 38.9 |
|                    | +4.3 | +3.8 | +4.4 | +1.2 | +6.1 | +5.9 | +1.6 | +0.5 | +6.8 | -0.5 | +5.0 | +6.8 |
| NVILA-Lite-15B     | 39.7 | 31.7 | 42.7 | 36.5 | 26.8 | 31.7 | 50.9 | 34.0 | 46.4 | 34.8 | 37.8 | 21.4 |
| 4D-RGPT-15B (Ours) | 43.0 | 35.8 | 45.7 | 38.5 | 32.2 | 39.0 | 50.0 | 38.4 | 49.6 | 36.3 | 45.9 | 28.6 |
|                    | +3.3 | +4.1 | +3.0 | +2.0 | +5.4 | +7.3 | -0.9 | +4.4 | +3.2 | +1.5 | +7.9 | +7.2 |

we observe that MLLMs tend to struggle with temporal perception. To demonstrate such a deficiency, we conduct a toy experiment. As shown in Fig. A15, we curate *TimeBench*, a simple set of VQA questions that require temporal perception of input frames, such as “How many seconds have passed in the input video?”. All videos are acquired from the STI-Bench [29] and VLM4D [88]. We note that these two benchmarks have 4 different frame rates, ranging from 10 to 30, as shown in Tab. 1. This makes it even more challenging for MLLMs to infer time duration. To avoid ambiguity in answers, we provide 4 extra options for each question, ranging from  $0.25\times$  to  $4\times$  of the actual time duration.

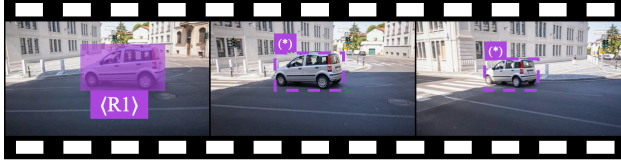

Q: Is (R1) spinning clockwise or counter-clockwise?

✓ not spinning    ✗ clockwise    ✗ counter-clockwise    ✗ no cars

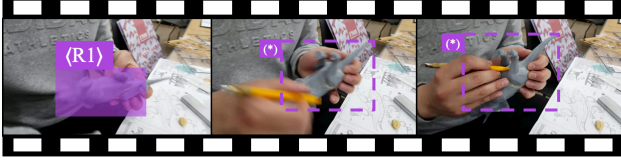

Q: What direction is (R1) moving towards?

✓ staying in place    ✗ left    ✗ right    ✗ towards

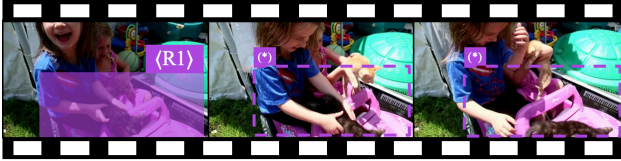

Q: What direction is (R1) moving toward?

✓ not moving    ✗ left    ✗ uphill    ✗ right

Figure A9. **False positive questions in R4D-Bench.** We note that the regions labeled with (\*) are not provided in R4D-Bench; they are visualized for readability.

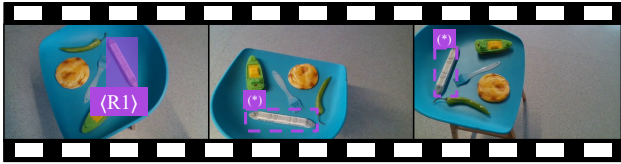

Q: At 7.00 sec, identify the correct 3D bounding box localization for (R1) from a single frame. (unit: cm, °).

✓ { dimensions: [23.62, 3.51, 2.79],  
central\_point: [5.88, 9.73, 51.40],  
orientation:  
{  
  yaw: 167.42,  
  pitch: 15.93,  
  roll: 59.99  
}  
}

✗ { dimensions: [22.87, 3.12, 2.79],  
central\_point: [5.88, 9.73, 51.15],  
orientation:  
{  
  yaw: 167.42,  
  pitch: 12.18,  
  roll: 63.74  
}  
}

Figure A10. **3D video grounding questions in R4D-Bench.** We note that the regions labeled with (\*) are not provided in R4D-Bench; they are visualized for readability. For simplicity, we only show 1 correct option and 1 wrong option here, but there are 5 options for each 3D video grounding question in R4D-Bench.

785

786

787

788

*Zero-shot* and *P4D* in Tab. A3 show that without cues, MLLMs struggle to know how much time has passed in the input frames. The baselines are naively guessing the answers, resulting in an accuracy close to random guessing (20%).

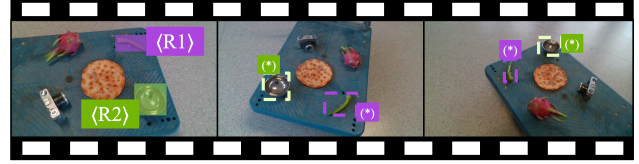

Q: At 7.00 sec, what is the positional relationship of the (R1) relative to the (R2)?

✗ left    ✓ right    ✗ front    ✗ back    ✗ up

Figure A11. **Spatial relation questions in R4D-Bench.** The question asks about the spatial relationship at 7 seconds, which corresponds to the middle frame out of the three frames shown. We note that the regions labeled with (\*) or (\*) are not provided in R4D-Bench; they are visualized for readability.

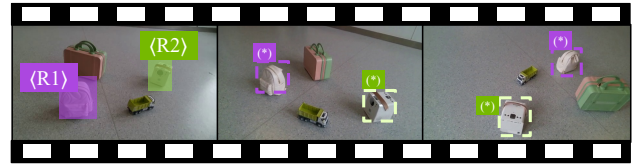

Q: At 0.00 sec, what is the most likely minimum relative distance between (R1) and (R2) (unit: cm)?

✗ 51.52    ✗ 59.00    ✓ 54.63    ✗ 47.78    ✗ 64.12

Figure A12. **Dimension measurement questions in R4D-Bench.** We note that the regions labeled with (\*) or (\*) are not provided in R4D-Bench; they are visualized for readability.

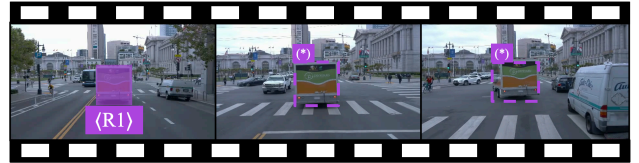

Q: From 0.00 sec to 12.80 sec, What is the most likely displacement (straight-line distance) of the (R1) between two frames?

✗ 36.72 m    ✗ 15.50 m    ✓ 27.50 m    ✗ 21.50 m    ✗ 30.50 m

Figure A13. **Displacement & path length questions in R4D-Bench.** We note that the regions labeled with (\*) are not provided in R4D-Bench; they are visualized for readability.

This problem is further exaggerated by the inconsistency that different sources of training data and evaluation benchmarks have different frame rates.

789

790

791

We observe that both *P4D+mark* and *P4D+prompt* can greatly improve the performance on *TimeBench*, which is expected since they provide explicit temporal cues. However, they require additional data preprocessing and distract MLLMs from the main visual and textual content. This toy experiment inspires us to develop methods that can provide temporal cues without modifying the input data, *i.e.*, our TPE.

792

793

794

795

796

797

798

799

**Training Data Mixture.** We conduct an ablation study

800

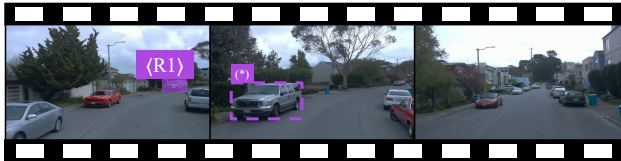

**Q:** At 3.00 sec, What is the most appropriate instantaneous speed of (R1) over the specified time interval?  
 ✗ 3.74 m/s   ✗ 0.75 m/s   ✓ 0.00 m/s   ✗ 14.97 m/s   ✗ 7.48 m/s

Figure A14. **Speed & acceleration questions in R4D-Bench.** We note that the regions labeled with (R1) are not provided in R4D-Bench; they are visualized for readability.

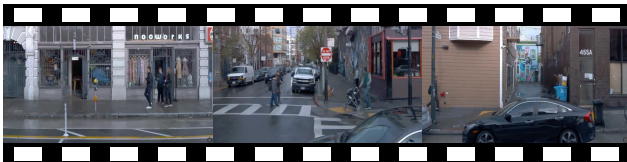

**Q:** How much time has passed in the video?  
 (a) 39.40 s (2.00×)   (b) 9.85 s (0.50×)   (c) 19.70 s ✓  
 (d) 59.10 s (4.00×)   (e) 4.92 s (0.25×)

Figure A15. **TimeBench VQA.** We curate a toy benchmark to evaluate MLLMs’ temporal perception. We note that the “(M×)” indicates the multiplier between the wrong option and the correct one. They are not provided in the actual question but are shown here for clarity.

Table A3. **Ablation studies on explicit temporal cues.** We experiment without and with different choices of explicit time cues. For simplicity, we use the same abbreviations as Tab. 4.

| Methods           | Time cues | TimeBench   | STI         | R4D         |
|-------------------|-----------|-------------|-------------|-------------|
| <i>Zero-shot</i>  | ✗         | 22.7        | 33.8        | 37.9        |
| <i>P4D</i>        | ✗         | 30.1        | 34.8        | 41.0        |
| <i>P4D+mark</i>   | marks     | 95.3        | 35.1        | 41.1        |
| <i>P4D+prompt</i> | prompts   | <b>98.0</b> | <b>36.1</b> | <b>41.5</b> |

801 on the training data mixture for 4D-RGPT. We incremen-  
 802 tally add different datasets to analyze their contributions.  
 803 In Tab. A4, we observe that compared to the *Zero-shot*  
 804 baseline, adding the training data from VSTI-Bench [15],  
 805 Wolf [26], or RoboFAC [39] improves the performance on  
 806 both non-region-based (STI-Bench) and region-based 4D  
 807 VQA (R4D-Bench). Though SAT [54] is an image-based  
 808 VQA dataset, adding it also brings moderate performance  
 809 gains, *i.e.*, +0.6% on STI-Bench and +0.4% on R4D-Bench.  
 810 **More Qualitative Results.** Following the format in Fig. 4,  
 811 we provide additional qualitative results on R4D-Bench in  
 812 Fig. A16, Fig. A17, Fig. A18, and Fig. A19.

813 **More  $\hat{P}_m$  Visualizations.** In Fig. A20, we provide addi-  
 814 tional visualizations of the 4D-RGPT explicit signals  $\hat{P}_m$  at  
 815 different training steps. In earlier steps, we observe inaccur-

Table A4. **Incremental training data mixture.** We incrementally add different datasets to analyze their contributions to 4D-RGPT. For simplicity, we use the same abbreviations as Tab. 4 and the following for each dataset: VSTI-Bench [15] (V); Wolf [26] (W); RoboFAC [39] (R); and SAT [54] (S).

| Methods          | V | W | R | S | STI         | R4D-Bench   |             |             |
|------------------|---|---|---|---|-------------|-------------|-------------|-------------|
|                  |   |   |   |   |             | Avg         | Sta         | Dyn         |
| <i>Zero-shot</i> | ✗ | ✗ | ✗ | ✗ | 33.8        | 37.9        | 29.1        | 41.3        |
| V                | ✓ | ✗ | ✗ | ✗ | 35.4        | 39.4        | 30.0        | 42.9        |
| V+W              | ✓ | ✓ | ✗ | ✗ | 36.0        | 40.6        | 31.0        | 44.2        |
| V+W+R            | ✓ | ✓ | ✓ | ✗ | 37.0        | 41.8        | 32.2        | 45.4        |
| V+W+R+S (Ours)   | ✓ | ✓ | ✓ | ✓ | <b>37.6</b> | <b>42.2</b> | <b>32.9</b> | <b>45.7</b> |

rate predictions with grid-like structures. We hypothesize  
 that this is due to the tokenization process in hidden states of  
 the LLM transformer, *i.e.*,  $F_{\text{hidden}}$ . However, as training pro-  
 ceeds, the grid-like structures gradually diminish, leading to  
 smoother and more reasonable predictions. We demonstrate  
 that our 4D-RGPT can effectively learn to extract explicit  
 4D perceptual signals through the training of P4D.

816  
817  
818  
819  
820  
821  
822

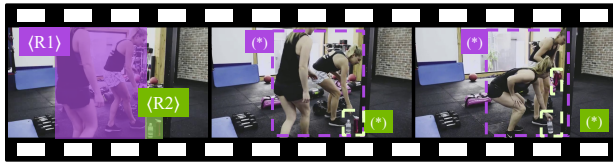

Q: Are (R1) picking up or putting down the (R2)?

✓ Ours: picking up      ✗ GPT: putting down

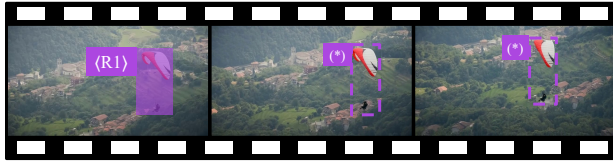

Q: Is the (R1) moving upwards or downwards?

✓ Ours: downwards      ✓ GPT: downwards

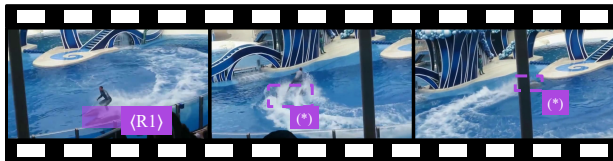

Q: Are (R1) turning clockwise or counter-clockwise?

✓ Ours: clockwise      ✗ GPT: counter-clockwise

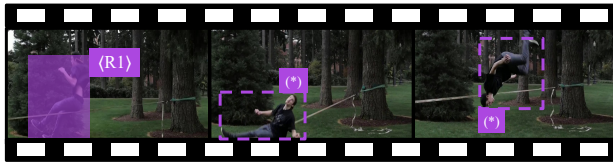

Q: Is (R1) turning clockwise or counter-clockwise?

✗ Ours: counter-clockwise      ✓ GPT: clockwise

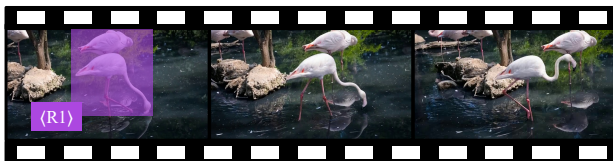

Q: How many (R1) are standing still?

✓ Ours: 5      ✗ GPT: 3

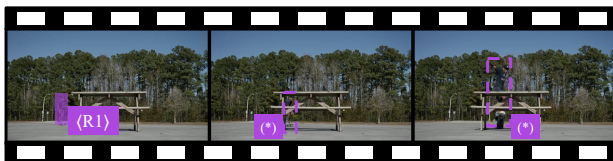

Q: How many times does the (R1) jump towards the camera?

✓ Ours: 1      ✓ GPT: 1

Figure A16. More VQA comparison between GPT-4o [44] and 4D-RGPT (Ours) on R4D-Bench. We provide 2 examples for each of the following categories: Translational, Rotational, and Counting.

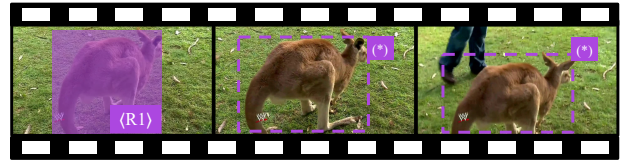

Q: What direction is (R1) moving towards?

✓ Ours: not moving      ✓ GPT: not moving

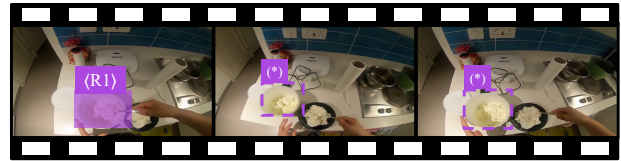

Q: How many scoops of (R1) does he move left?

✗ Ours: 1      ✗ GPT: 2      ✓ Ans: 0

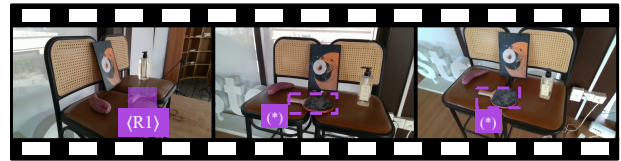

Q: At 27.00 sec, given a single frame, determine the 3D bounding box of (R1). Identify the correct dimensions, central point, and orientation including yaw, pitch, and roll. (unit: cm, °)

✓ Ours & GPT: {  
 dimensions: [25.62, 2.38, 15.33],  
 central\_point: [12.91, 2.77, 90.59],  
 orientation: {  
   yaw: 117.10,  
   pitch: 42.61,  
   roll: 114.41  
 }  
 }

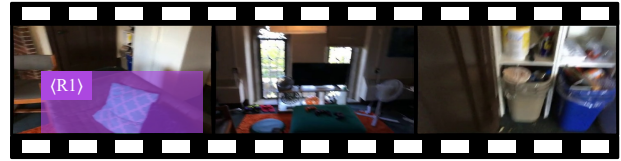

Q: At 18.52 sec, what is the 3D bounding box in camera coordinates of the (R1) from a single randomly selected frame? (unit: m, m/s, m/s^2, °)

✓ Ours: {  
 C\_lwh:  
 [0.86, 1.26, 0.74],  
 C\_central\_point:  
 [3.55, 1.33, 2.75],  
 C\_heading:  
 27.51  
 }  
 ✗ GPT: {  
 C\_lwh:  
 [0.86, 1.26, 0.74],  
 C\_central\_point:  
 [3.74, 1.39, 2.81],  
 C\_heading:  
 27.20  
 }

Figure A17. More VQA comparison between GPT-4o [44] and 4D-RGPT (Ours) on R4D-Bench. We provide 2 examples for each of the following categories: False Positive and 3D Video Grounding.

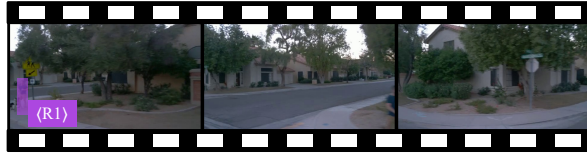

Q: From 0.00 sec to 1.06 sec, what is the most appropriate height of (R1)? (unit: m, m/s, m/s<sup>2</sup>, °)

✓Ours: 1.86 m      ✓GPT: 1.86

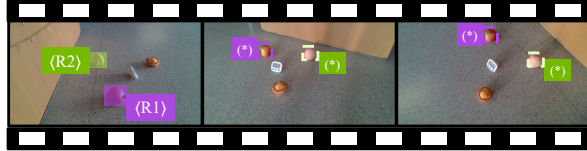

Q: At 0.00 sec, What is the most likely minimum relative distance between (R1) and (R2) in a given frame? (unit: cm, °)

✓Ours: 18.54 cm      ✗GPT: 16.71 cm

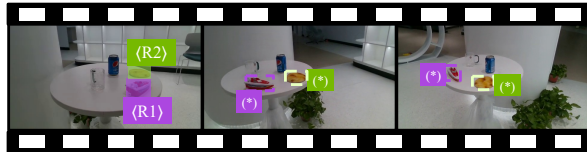

Q: At 6.00 sec, What is the positional relationship of (R1) relative to (R2) from the observer's perspective?

✓Ours: left      ✓GPT: left

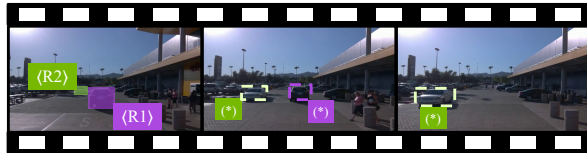

Q: At 3.00 sec, What is the positional relationship of the (R2) relative to (R1)?

✓Ours: left      ✓GPT: left

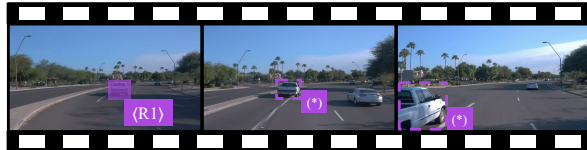

Q: At 6.00 sec, what is the most appropriate average or instantaneous speed of (R1)?

✓Ours: 4.60 m/s      ✓GPT: 4.60 m/s

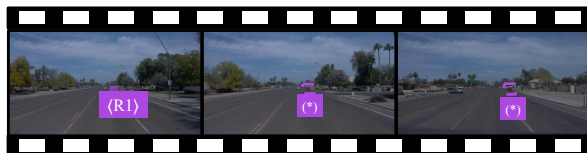

Q: At 14.00 sec, what is the most appropriate average or instantaneous speed of (R1)?

✓Ours: 0.00 m/s      ✗GPT: 0.20 m/s

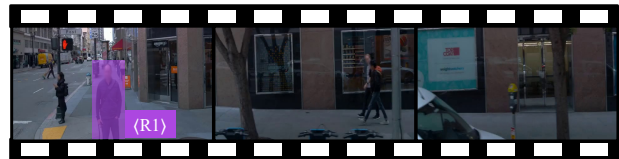

Q: At 0.28 sec, What is the most appropriate trajectory length (total distance traveled) of (R1) between two frames? (unit: m, m/s, m/s<sup>2</sup>, °)

✓Ours: 0.0 m      ✗GPT: 0.2 m

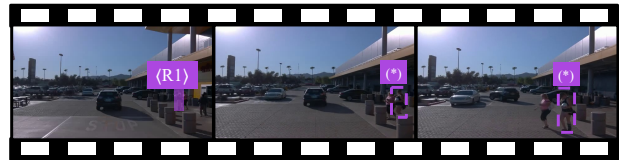

Q: From 0.00 sec to 9.50 sec, what is the most likely displacement (straight-line distance) of the camera or object between two frames for (R1)?

✗Ours: 7.53 m      ✗GPT: 10.06 m      ✓Ans: 8.50 m

Figure A19. More VQA comparison between GPT-4o [44] and 4D-RGPT (Ours) on R4D-Bench. We provide 2 examples for each of the following categories: Displacement & Path Length.

Figure A18. More VQA comparison between GPT-4o [44] and 4D-RGPT (Ours) on R4D-Bench. We provide 2 examples for each of the following categories: Spatial Relation, Dimension Measurement, and Speed & Acceleration.

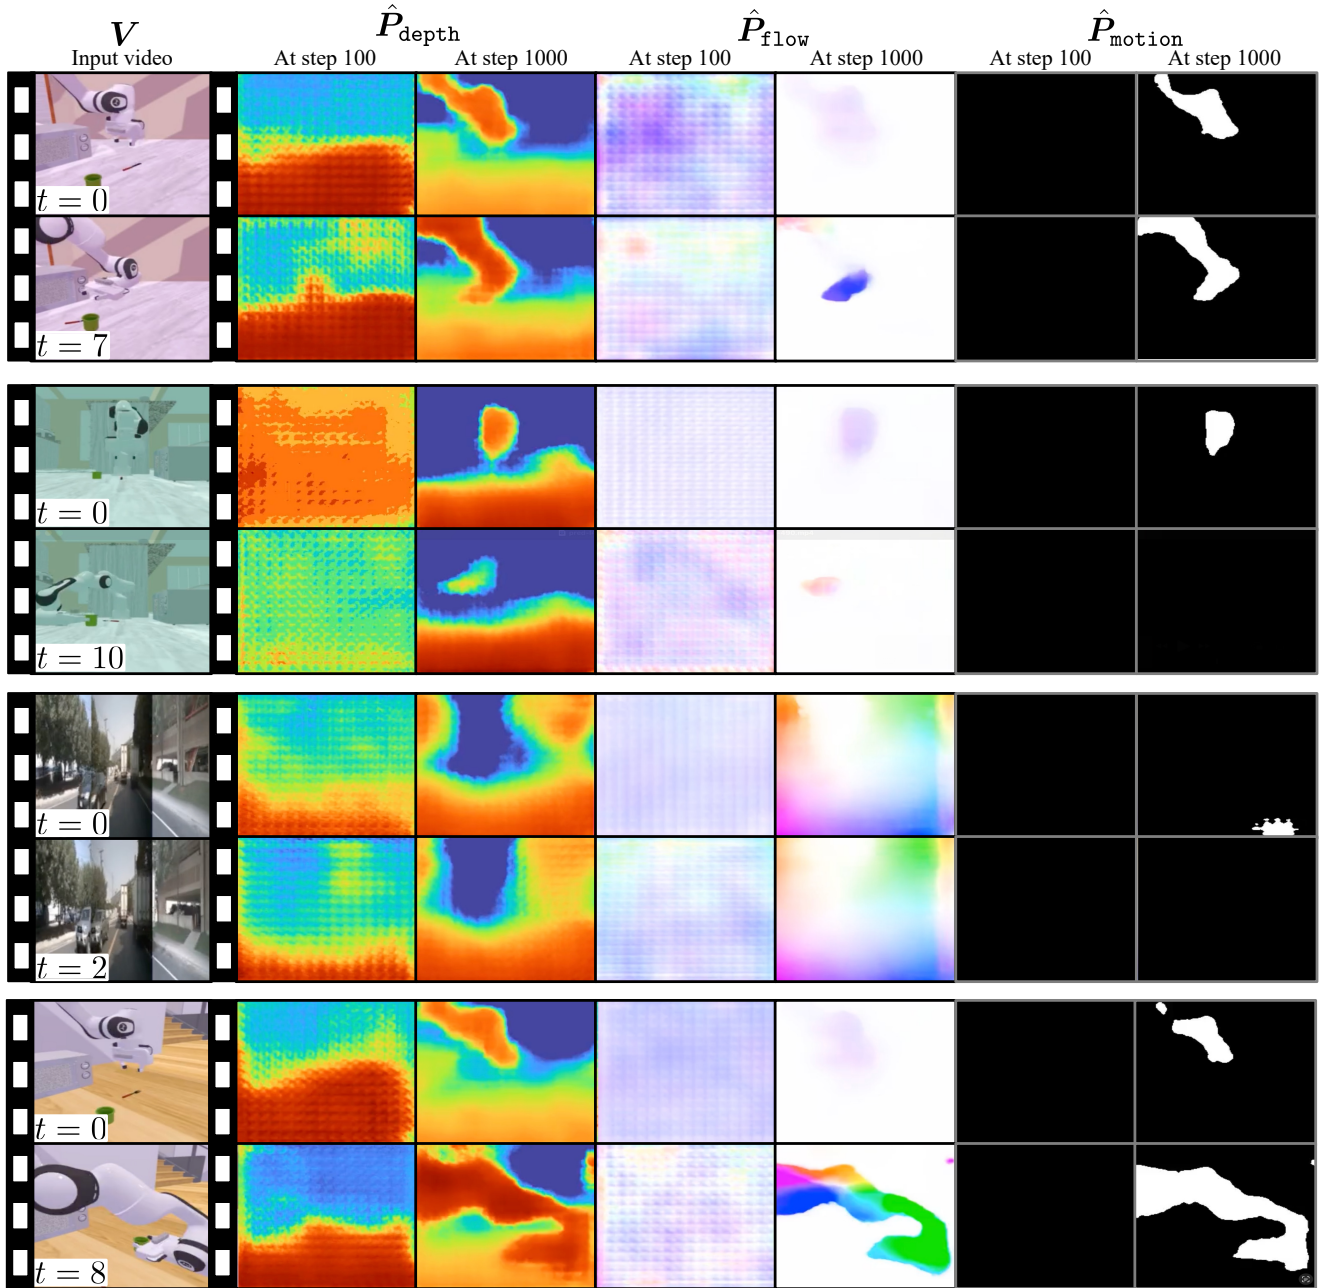

Figure A20. More visualizations of 4D-RGPT explicit signals  $\hat{P}_m$ . Similar to the format of Fig. 5, we visualize the training progress of  $\hat{P}_{\text{depth}}$ ,  $\hat{P}_{\text{flow}}$ , and  $\hat{P}_{\text{motion}}$ .

823

## References

824

825

826

827

828

829

830

831

832

833

834

835

836

837

838

839

840

841

842

843

844

845

846

847

848

849

850

851

852

853

854

855

856

857

858

859

860

861

862

863

864

865

866

867

868

869

870

871

872

873

874

875

876

877

878

879

- [1] Josh Achiam, Steven Adler, Sandhini Agarwal, Lama Ahmad, Ilge Akkaya, Florencia Leoni Aleman, Diogo Almeida, Janko Altenschmidt, Sam Altman, Shyamal Anadkat, et al. GPT-4 technical report. *arXiv preprint arXiv:2303.08774*, 2023. 1, 2
- [2] Abhishek Badki, Hang Su, Bowen Wen, and Orazio Gallo. L4P: Low-level 4D vision perception unified. *arXiv preprint arXiv:2502.13078*, 2025. 3, 6
- [3] Jinze Bai, Shuai Bai, Yunfei Chu, Zeyu Cui, Kai Dang, Xiaodong Deng, Yang Fan, Wenbin Ge, Yu Han, Fei Huang, et al. Qwen technical report. *arXiv preprint arXiv:2309.16609*, 2023. 2
- [4] Holger Caesar, Varun Bankiti, Alex H Lang, Sourabh Vora, Venice Erin Liong, Qiang Xu, Anush Krishnan, Yu Pan, Giancarlo Baldan, and Oscar Beijbom. nuScenes: A multimodal dataset for autonomous driving. In *Proc. CVPR*, 2020. 1
- [5] Mu Cai, Haotian Liu, Siva Karthik Mustikovela, Gregory P Meyer, Yuning Chai, Dennis Park, and Yong Jae Lee. Vi-LLaVA: Making large multimodal models understand arbitrary visual prompts. In *Proc. CVPR*, 2024. 2
- [6] Gongwei Chen, Leyang Shen, Rui Shao, Xiang Deng, and Liqiang Nie. LION: Empowering multimodal large language model with dual-level visual knowledge. In *Proc. CVPR*, 2024. 2
- [7] Keqin Chen, Zhao Zhang, Weili Zeng, Richong Zhang, Feng Zhu, and Rui Zhao. Shikra: Unleashing multimodal llm’s referential dialogue magic. *arXiv preprint arXiv:2306.15195*, 2023. 2
- [8] Pingyi Chen, Yujing Lou, Shen Cao, Jinhui Guo, Lubin Fan, Yue Wu, Lin Yang, Lizhuang Ma, and Jieping Ye. SD-VLM: Spatial measuring and understanding with depth-encoded vision-language models. In *Proc. NeurIPS*, 2025. 2
- [9] Yiming Chen, Zekun Qi, Wenyao Zhang, Xin Jin, Li Zhang, and Peidong Liu. Reasoning in space via grounding in the world. *arXiv preprint arXiv:2510.13800*, 2025. 2
- [10] Zhe Chen, Weiyun Wang, Yue Cao, Yangzhou Liu, Zhangwei Gao, Erfei Cui, Jinguo Zhu, Shenglong Ye, Hao Tian, Zhaoyang Liu, et al. Expanding performance boundaries of open-source multimodal models with model, data, and test-time scaling. *arXiv preprint arXiv:2412.05271*, 2024. 6
- [11] An-Chieh Cheng, Yang Fu, Yukang Chen, Zhijian Liu, Xiaolong Li, Subhashree Radhakrishnan, Song Han, Yao Lu, Jan Kautz, Pavlo Molchanov, et al. 3d aware region prompted vision language model. *arXiv preprint arXiv:2509.13317*, 2025. 2, 7
- [12] Gheorghe Comanici, Eric Bieber, Mike Schaekermann, Ice Pasupat, Naveen Sachdeva, Inderjit Dhillon, Marcel Blistein, Ori Ram, Dan Zhang, Evan Rosen, et al. Gemini 2.5: Pushing the frontier with advanced reasoning, multimodality, long context, and next generation agentic capabilities. *arXiv preprint arXiv:2507.06261*, 2025. 2, 6
- [13] Angela Dai, Angel X Chang, Manolis Savva, Maciej Halber, Thomas Funkhouser, and Matthias Nießner. ScanNet: Richly-annotated 3d reconstructions of indoor scenes. In *Proc. CVPR*, 2017. 1
- [14] Abhimanyu Dubey, Abhinav Jauhri, Abhinav Pandey, Abhishek Kadian, Ahmad Al-Dahle, Aiesha Letman, Akhil Mathur, Alan Schelten, Amy Yang, Angela Fan, et al. The llama 3 herd of models. *arXiv preprint arXiv:2407.21783*, 2024. 1, 2
- [15] Zhiwen Fan, Jian Zhang, Renjie Li, Junge Zhang, Runjin Chen, Hezhen Hu, Kevin Wang, Huaizhi Qu, Dilin Wang, Zhicheng Yan, et al. VLM-3R: Vision-language models augmented with instruction-aligned 3d reconstruction. *arXiv preprint arXiv:2505.20279*, 2025. 2, 5, 6, 1, 7
- [16] Xavier Glorot and Yoshua Bengio. Understanding the difficulty of training deep feedforward neural networks. In *Proc. AISTATS*, 2010. 1
- [17] D Hendrycks. Gaussian error linear units (GELUs). *arXiv preprint arXiv:1606.08415*, 2016. 1
- [18] Miran Heo, Min-Hung Chen, De-An Huang, Sifei Liu, Subhashree Radhakrishnan, Seon Joo Kim, Yu-Chiang Frank Wang, and Ryo Hachiuma. Omni-RGPT: Unifying image and video region-level understanding via token marks. In *Proc. CVPR*, 2025. 2
- [19] Edward J Hu, Yelong Shen, Phillip Wallis, Zeyuan Allen-Zhu, Yuanzhi Li, Shean Wang, Lu Wang, Weizhu Chen, et al. LoRA: Low-rank adaptation of large language models. In *Proc. ICLR*, 2022. 8
- [20] Xiaohu Huang, Jingjing Wu, Qunyi Xie, and Kai Han. Mllms need 3d-aware representation supervision for scene understanding. In *Proc. NeurIPS*, 2025. 2
- [21] Mengdi Jia, Zekun Qi, Shaochen Zhang, Wenyao Zhang, Xinqiang Yu, Jiawei He, He Wang, and Li Yi. OmniSpatial: Towards comprehensive spatial reasoning benchmark for vision language models. *arXiv preprint arXiv:2506.03135*, 2025. 2, 5, 6
- [22] Dohwan Ko, Sihyeon Kim, Yumin Suh, Minseo Yoon, Manmohan Chandraker, Hyunwoo J Kim, et al. ST-VLM: Kinematic instruction tuning for spatio-temporal reasoning in vision-language models. *arXiv preprint arXiv:2503.19355*, 2025. 2
- [23] Byung-Kwan Lee, Beomchan Park, Chae Won Kim, and Yong Man Ro. CoLLaVO: Crayon large language and vision mOdel. In *Proc. ACL*, 2024. 2
- [24] Xuanyu Lei, Zonghan Yang, Xinrui Chen, Peng Li, and Yang Liu. Scaffolding coordinates to promote vision-language coordination in large multi-modal models. In *Proc. ACL*, 2025. 2
- [25] Bo Li, Yuanhan Zhang, Dong Guo, Renrui Zhang, Feng Li, Hao Zhang, Kaichen Zhang, Peiyuan Zhang, Yanwei Li, Ziwei Liu, et al. Llava-onevision: Easy visual task transfer. *TMLR*, 2025. 6
- [26] Boyi Li, Ligeng Zhu, Ran Tian, Shuhan Tan, Yuxiao Chen, Yao Lu, Yin Cui, Sushant Veer, Max Ehrlich, Jonah Philion, et al. Wolf: Dense video captioning with a world summarization framework. *TMLR*, 2025. 5, 1, 2, 7
- [27] Hongxing Li, Dingming Li, Zixuan Wang, Yuchen Yan, Hang Wu, Wenqi Zhang, Yongliang Shen, Weiming Lu, Jun Xiao, and Yueting Zhuang. SpatialLadder: Progressive training for spatial reasoning in vision-language models. *arXiv preprint arXiv:2510.08531*, 2025. 2
- [28] Pengteng Li, Pinhao Song, Wuyang Li, Weiyu Guo, Huizai Yao, Yijie Xu, Dugang Liu, and Hui Xiong. See&trek: 880  
881  
882  
883  
884  
885  
886  
887  
888  
889  
890  
891  
892  
893  
894  
895  
896  
897  
898  
899  
900  
901  
902  
903  
904  
905  
906  
907  
908  
909  
910  
911  
912  
913  
914  
915  
916  
917  
918  
919  
920  
921  
922  
923  
924  
925  
926  
927  
928  
929  
930  
931  
932  
933  
934  
935  
936

- 937 Training-free spatial prompting for multimodal large language  
938 model. In *Proc. NeurIPS*, 2025. 2
- 939 [29] Yun Li, Yiming Zhang, Tao Lin, XiangRui Liu, Wenxiao Cai,  
940 Zheng Liu, and Bo Zhao. STI-Bench: Are MLLMs ready  
941 for precise spatial-temporal world understanding? In *Proc.*  
942 *ICCV*, 2025. 2, 3, 5, 6, 7, 4
- 943 [30] Ji Lin, Hongxu Yin, Wei Ping, Pavlo Molchanov, Mohammad  
944 Shoeybi, and Song Han. VILA: On pre-training for visual  
945 language models. In *Proc. CVPR*, 2024. 2
- 946 [31] Weifeng Lin, Xinyu Wei, Ruichuan An, Peng Gao, Bocheng  
947 Zou, Yulin Luo, Siyuan Huang, Shanghang Zhang, and Hong-  
948 sheng Li. Draw-and-understand: Leveraging visual prompts  
949 to enable mllms to comprehend what you want. In *Proc.*  
950 *ICLR*, 2025. 2
- 951 [32] Haotian Liu, Chunyuan Li, Qingyang Wu, and Yong Jae Lee.  
952 Visual instruction tuning. In *Proc. NeurIPS*, 2023. 2
- 953 [33] Haotian Liu, Chunyuan Li, Yuheng Li, and Yong Jae Lee.  
954 Improved baselines with visual instruction tuning. In *Proc.*  
955 *CVPR*, 2024. 2
- 956 [34] Haotian Liu, Chunyuan Li, Yuheng Li, Bo Li, Yuanhan Zhang,  
957 Sheng Shen, and Yong Jae Lee. LLaVA-NeXT: Improved  
958 reasoning, ocr, and world knowledge, 2024. 6
- 959 [35] Shilong Liu, Zhaoyang Zeng, Tianhe Ren, Feng Li, Hao  
960 Zhang, Jie Yang, Qing Jiang, Chunyuan Li, Jianwei Yang,  
961 Hang Su, et al. Grounding DINO: Marrying DINO with  
962 grounded pre-training for open-set object detection. In *Proc.*  
963 *ECCV*, 2024. 5, 2
- 964 [36] Zikang Liu, Longteng Guo, Yepeng Tang, Tongtian Yue, Jun-  
965 xian Cai, Kai Ma, Qingbin Liu, Xi Chen, and Jing Liu. Vrope:  
966 Rotary position embedding for video large language models.  
967 In *Proc. EMNLP*, 2025. 2
- 968 [37] Zhijian Liu, Ligeng Zhu, Baifeng Shi, Zhuoyang Zhang, Yum-  
969 ing Lou, Shang Yang, Haocheng Xi, Shiyi Cao, Yuxian Gu,  
970 Dacheng Li, et al. NVILA: Efficient frontier visual language  
971 models. In *Proc. CVPR*, 2025. 2, 6, 7, 8, 1
- 972 [38] Jinghui Lu, Haiyang Yu, Yanjie Wang, Yongjie Ye, Jingqun  
973 Tang, Ziwei Yang, Binghong Wu, Qi Liu, Hao Feng, Han  
974 Wang, et al. A bounding box is worth one token-interleaving  
975 layout and text in a large language model for document un-  
976 derstanding. In *ACL Findings*, 2025. 2
- 977 [39] Weifeng Lu, Minghao Ye, Zewei Ye, Ruihan Tao, Shuo  
978 Yang, and Bo Zhao. RoboFAC: A comprehensive framework  
979 for robotic failure analysis and correction. *arXiv preprint*  
980 *arXiv:2505.12224*, 2025. 5, 8, 1, 2, 7
- 981 [40] Chuofan Ma, Yi Jiang, Jiannan Wu, Zehuan Yuan, and Xiao-  
982 juan Qi. Groma: Localized visual tokenization for grounding  
983 multimodal large language models. In *Proc. ECCV*, 2024. 2
- 984 [41] Wufei Ma, Yu-Cheng Chou, Qihao Liu, Xingrui Wang, Celso  
985 M de Melo, Jianwen Xie, and Alan Yuille. SpatialReasoner:  
986 Towards explicit and generalizable 3d spatial reasoning. In  
987 *Proc. NeurIPS*, 2025. 2, 6, 7
- 988 [42] Wufei Ma, Luoxin Ye, Celso M de Melo, Alan Yuille, and  
989 Jieneng Chen. Spatialllm: A compound 3d-informed design  
990 towards spatially-intelligent large multimodal models. In  
991 *Proc. CVPR*, 2025. 2
- 992 [43] Yunze Man, De-An Huang, Guilin Liu, Shiwei Sheng, Shi-  
993 long Liu, Liang-Yan Gui, Jan Kautz, Yu-Xiong Wang, and  
Zhidong Yu. ARGUS: Vision-centric reasoning with grounded  
chain-of-thought. In *Proc. CVPR*, 2025. 2
- [44] OpenAI. GPT-4o system card. *arXiv preprint*  
*arXiv:2410.21276*, 2024. 1, 2, 6, 7, 8, 9
- [45] OpenAI. Gpt-5. <https://openai.com/chatgpt>,  
2025. Large language model. 1, 2, 6
- [46] Kun Ouyang, Yuanxin Liu, Haoning Wu, Yi Liu, Hao Zhou,  
Jie Zhou, Fandong Meng, and Xu Sun. Spacer: Rein-  
forcing mllms in video spatial reasoning. *arXiv preprint*  
*arXiv:2504.01805*, 2025. 2, 6, 7
- [47] Zhiliang Peng, Wenhui Wang, Li Dong, Yaru Hao, Shaohan  
Huang, Shuming Ma, Qixiang Ye, and Furu Wei. Grounding  
multimodal large language models to the world. In *Proc.*  
*ICLR*, 2024. 2
- [48] Federico Perazzi, Jordi Pont-Tuset, Brian McWilliams, Luc  
Van Gool, Markus Gross, and Alexander Sorkine-Hornung.  
A benchmark dataset and evaluation methodology for video  
object segmentation. In *Proc. CVPR*, 2016. 2
- [49] Jordi Pont-Tuset, Federico Perazzi, Sergi Caelles, Pablo  
Arbeláez, Alexander Sorkine-Hornung, and Luc Van Gool.  
The 2017 DAVIS challenge on video object segmentation.  
*arXiv:1704.00675*, 2017. 5, 2
- [50] Shraman Pramanick, Guangxing Han, Rui Hou, Sayan Nag,  
Ser-Nam Lim, Nicolas Ballas, Qifan Wang, Rama Chellappa,  
and Amjad Almahairi. Jack of all tasks master of many:  
Designing general-purpose coarse-to-fine vision-language  
model. In *Proc. CVPR*, 2024. 2
- [51] Alibaba Group Qwen Team. Qwen2.5-vl technical report.  
*arXiv preprint arXiv:2502.13923*, 2025. 2, 5, 6, 7, 3
- [52] René Ranftl, Alexey Bochkovskiy, and Vladlen Koltun. Vi-  
sion transformers for dense prediction. In *Proc. ICCV*, 2021.  
1
- [53] Nikhila Ravi, Valentin Gabeur, Yuan-Ting Hu, Ronghang  
Hu, Chaitanya Ryali, Tengyu Ma, Haitham Khedr, Roman  
Rädle, Chloe Rolland, Laura Gustafson, Eric Mintun, Junting  
Pan, Kalyan Vasudev Alwala, Nicolas Carion, Chao-Yuan  
Wu, Ross Girshick, Piotr Dollár, and Christoph Feichtenhofer.  
Sam 2: Segment anything in images and videos. In *Proc.*  
*ICLR*, 2025. 5, 2
- [54] Arijit Ray, Jiafei Duan, Reuben Tan, Dina Bashkirova, Rose  
Hendrix, Kiana Ehsani, Aniruddha Kembhavi, Bryan A Plum-  
mer, Ranjay Krishna, Kuo-Hao Zeng, et al. SAT: Spatial  
aptitude training for multimodal language models. In *Proc.*  
*COLM*, 2025. 2, 5, 6, 1, 7
- [55] Shuhuai Ren, Linli Yao, Shicheng Li, Xu Sun, and Lu Hou.  
Timechat: A time-sensitive multimodal large language model  
for long video understanding. In *Proc. CVPR*, 2024. 2
- [56] Yifan Shen, Yuanzhe Liu, Jingyuan Zhu, Xu Cao, Xiaofeng  
Zhang, Yixiao He, Wenming Ye, James Matthew Rehg, and  
Ismiini Lourentzou. Fine-grained preference optimization  
improves spatial reasoning in vlms. In *Proc. NeurIPS*, 2025.  
2
- [57] Yumeng Shi, Quanyu Long, Yin Wu, and Wenya Wang.  
Causality matters: How temporal information emerges in  
video language models. *arXiv preprint arXiv:2508.11576*,  
2025. 2

- 1050 [58] Peiwen Sun, Shiqiang Lang, Dongming Wu, Yi Ding, Kaituo  
1051 Feng, Huadai Liu, Zhen Ye, Rui Liu, Yun-Hui Liu, Jianan  
1052 Wang, et al. Spacevista: All-scale visual spatial reasoning  
1053 from mm to km. *arXiv preprint arXiv:2510.09606*, 2025. 2
- 1054 [59] Gemini Team, Petko Georgiev, Ving Ian Lei, Ryan Burnell,  
1055 Libin Bai, Anmol Gulati, Garrett Tanzer, Damien Vincent,  
1056 Zhufeng Pan, Shibo Wang, et al. Gemini 1.5: Unlocking mul-  
1057 timodal understanding across millions of tokens of context.  
1058 *arXiv preprint arXiv:2403.05530*, 2024. 2, 6
- 1059 [60] Qwen Team et al. Qwen2 technical report. *arXiv preprint*  
1060 *arXiv:2407.10671*, 2024. 6
- 1061 [61] Yunjie Tian, Tianren Ma, Lingxi Xie, Jihao Qiu, Xi Tang,  
1062 Yuan Zhang, Jianbin Jiao, Qi Tian, and Qixiang Ye. Chatter-  
1063 Box: Multi-round multimodal referring and grounding. In  
1064 *Proc. AAAI*, 2025. 2
- 1065 [62] Maxim Tkachenko, Mikhail Malyuk, Andrey Holmanyuk,  
1066 and Nikolai Liubimov. Label Studio: Data labeling soft-  
1067 ware, 2020-2025. Open source software available from  
1068 <https://github.com/HumanSignal/label-studio>. 3
- 1069 [63] Hugo Touvron, Thibaut Lavril, Gautier Izacard, Xavier Mar-  
1070 tinet, Marie-Anne Lachaux, Timothée Lacroix, Baptiste Roz-  
1071 ière, Naman Goyal, Eric Hambro, Faisal Azhar, et al. Llama:  
1072 Open and efficient foundation language models. *arXiv*  
1073 *preprint arXiv:2302.13971*, 2023. 2
- 1074 [64] Hugo Touvron, Louis Martin, Kevin Stone, Peter Albert, Am-  
1075 jad Almahairi, Yasmine Babaei, Nikolay Bashlykov, Soumya  
1076 Batra, Prajjwal Bhargava, Shruti Bhosale, et al. Llama 2:  
1077 Open foundation and fine-tuned chat models. *arXiv preprint*  
1078 *arXiv:2307.09288*, 2023. 2
- 1079 [65] Limin Wang, Bingkun Huang, Zhiyu Zhao, Zhan Tong, Yinan  
1080 He, Yi Wang, Yali Wang, and Yu Qiao. VideoMAE V2:  
1081 Scaling video masked autoencoders with dual masking. In  
1082 *Proc. CVPR*, 2023. 1
- 1083 [66] Weiyun Wang, Yiming Ren, Haowen Luo, Tiantong Li,  
1084 Chenxiang Yan, Zhe Chen, Wenhai Wang, Qingyun Li, Lewei  
1085 Lu, Xizhou Zhu, et al. The All-Seeing project v2: Towards  
1086 general relation comprehension of the open world. In *Proc.*  
1087 *ECCV*, 2024. 2
- 1088 [67] Weiyun Wang, Min Shi, Qingyun Li, Wenhai Wang, Zhen-  
1089 hang Huang, Linjie Xing, Zhe Chen, Hao Li, Xizhou Zhu,  
1090 Zhiguo Cao, et al. The all-seeing project: Towards panoptic  
1091 visual recognition and understanding of the open world. In  
1092 *Proc. ICLR*, 2024. 2
- 1093 [68] Thomas Wolf, Lysandre Debut, Victor Sanh, Julien Chau-  
1094 mond, Clement Delangue, Anthony Moi, Pierric Cistac, Tim  
1095 Rault, Rémi Louf, Morgan Funtowicz, et al. Huggingface’s  
1096 transformers: State-of-the-art natural language processing.  
1097 *arXiv preprint arXiv:1910.03771*, 2019. 1
- 1098 [69] Sangmin Woo, Kang Zhou, Yun Zhou, Shuai Wang, Sheng  
1099 Guan, Haibo Ding, and Lin Lee Cheong. Black-box visual  
1100 prompt engineering for mitigating object hallucination in  
1101 large vision language models. In *Proc. NAACL*, 2025. 2
- 1102 [70] Diankun Wu, Fangfu Liu, Yi-Hsin Hung, and Yueqi Duan.  
1103 Spatial-mlm: Boosting mllm capabilities in visual-based  
1104 spatial intelligence. In *Proc. NeurIPS*, 2025. 2
- 1105 [71] Junfei Wu, Jian Guan, Kaituo Feng, Qiang Liu, Shu Wu,  
1106 Liang Wang, Wei Wu, and Tieniu Tan. Reinforcing spatial  
reasoning in vision-language models with interwoven think-  
ing and visual drawing. In *Proc. NeurIPS*, 2025. 2, 6, 7
- [72] Runsen Xu, Weiyao Wang, Hao Tang, Xingyu Chen, Xi-  
aodong Wang, Fu-Jen Chu, Dahua Lin, Matt Feiszli, and  
Kevin J Liang. Multi-SpatialMLLM: Multi-frame spatial un-  
derstanding with multi-modal large language models. *arXiv*  
*preprint arXiv:2505.17015*, 2025. 2
- [73] An Yang, Baosong Yang, Beichen Zhang, Binyuan Hui, Bo  
Zheng, Bowen Yu, Chengyuan Li, Dayiheng Liu, Fei Huang,  
Haoran Wei, et al. Qwen2.5 technical report. *arXiv preprint*  
*arXiv:2412.15115*, 2024. 1, 2
- [74] Jianwei Yang, Hao Zhang, Feng Li, Xueyan Zou, Chunyuan  
Li, and Jianfeng Gao. Set-of-mark prompting unleashes  
extraordinary visual grounding in gpt-4v. *arXiv preprint*  
*arXiv:2310.11441*, 2023. 2, 5, 6, 8, 3
- [75] Jihan Yang, Shusheng Yang, Anjali W Gupta, Rilyn Han, Li  
Fei-Fei, and Saining Xie. Thinking in space: How multimodal  
large language models see, remember, and recall spaces. In  
*Proc. CVPR*, 2025. 1
- [76] Sihan Yang, Runsen Xu, Yiman Xie, Sizhe Yang, Mo Li,  
Jingli Lin, Chenming Zhu, Xiaochen Chen, Haodong Duan,  
Xiangyu Yue, et al. MMSI-Bench: A benchmark for multi-  
image spatial intelligence. *arXiv preprint arXiv:2505.23764*,  
2025. 2, 3, 5, 6
- [77] Chandan Yeshwanth, Yueh-Cheng Liu, Matthias Nießner, and  
Angela Dai. ScanNet++: A high-fidelity dataset of 3d indoor  
scenes. In *Proc. ICCV*, 2023. 1
- [78] Xiangyu Zeng, Kunchang Li, Chenting Wang, Xinhao Li,  
Tianxiang Jiang, Ziang Yan, Songze Li, Yansong Shi, Zhen-  
grong Yue, Yi Wang, et al. Timesuite: Improving mllms for  
long video understanding via grounded tuning. In *Proc. ICLR*,  
2025. 2
- [79] Xiaohua Zhai, Basil Mustafa, Alexander Kolesnikov, and  
Lucas Beyer. Sigmoid loss for language image pre-training.  
In *Proc. ICCV*, 2023. 6, 1
- [80] Boqiang Zhang, Kehan Li, Zesen Cheng, Zhiqiang Hu,  
Yuqian Yuan, Guanzheng Chen, Sicong Leng, Yuming Jiang,  
Hang Zhang, Xin Li, et al. Videollama 3: Frontier multimodal  
foundation models for image and video understanding. *arXiv*  
*preprint arXiv:2501.13106*, 2025. 6
- [81] Jiahui Zhang, Yurui Chen, Yanpeng Zhou, Yueming Xu, Ze  
Huang, Jilin Mei, Junhui Chen, Yu-Jie Yuan, Xinyue Cai,  
Guowei Huang, et al. From flatland to space: Teaching  
vision-language models to perceive and reason in 3d. In *Proc.*  
*NeurIPS*, 2025. 2
- [82] Shilong Zhang, Peize Sun, Shoufa Chen, Min Xiao, Wenqi  
Shao, Wenwei Zhang, Yu Liu, Kai Chen, and Ping Luo.  
GPT4RoI: Instruction tuning large language model on region-  
of-interest. In *Proc. ECCV Workshop*, 2024. 2
- [83] Yuanhan Zhang, Jinming Wu, Wei Li, Bo Li, Zejun Ma, Ziwei  
Liu, and Chunyuan Li. Video instruction tuning with synthetic  
data. *arXiv preprint arXiv:2410.02713*, 2024. 6, 7
- [84] Liang Zhao, En Yu, Zheng Ge, Jinrong Yang, Haoran Wei,  
Hongyu Zhou, Jianjian Sun, Yuang Peng, Runpei Dong, Chun-  
rui Han, and Xiangyu Zhang. ChatSpot: Bootstrapping multi-  
modal llms via precise referring instruction tuning. In *Proc.*  
*IJCAI*, 2024. 2

- 1164 [85] Duo Zheng, Shijia Huang, Yanyang Li, and Liwei Wang.  
1165 Learning from videos for 3d world: Enhancing mllms with  
1166 3d vision geometry priors. In *Proc. NeurIPS*, 2025. 2
- 1167 [86] Hanyu Zhou and Gim Hee Lee. LLaVA-4D: Embedding  
1168 spatiotemporal prompt into llms for 4d scene understanding.  
1169 *arXiv preprint arXiv:2505.12253*, 2025. 2
- 1170 [87] Honglu Zhou, Xiangyu Peng, Shrikant Kendre, Michael S  
1171 Ryoo, Silvio Savarese, Caiming Xiong, and Juan Carlos  
1172 Niebles. Strefer: Empowering video llms with space-time  
1173 referring and reasoning via synthetic instruction data. In *Proc.*  
1174 *ICCV*, 2025. 2
- 1175 [88] Shijie Zhou, Alexander Vilesov, Xuehai He, Ziyu Wan,  
1176 Shuwang Zhang, Aditya Nagachandra, Di Chang, Dongdong  
1177 Chen, Eric Xin Wang, and Achuta Kadambi. VLM4D: To-  
1178 wards spatiotemporal awareness in vision language models.  
1179 In *Proc. ICCV*, 2025. 2, 3, 5, 6
- 1180 [89] Deyao Zhu, Jun Chen, Xiaoqian Shen, Xiang Li, and Mo-  
1181 hamed Elhoseiny. MiniGPT-4: Enhancing vision-language  
1182 understanding with advanced large language models. In *Proc.*  
1183 *ICLR*, 2024. 2
